# Supplementary material
Source: Springer Nature journal article supplement (https://www.springermedizin.de/resource/supplementary/12882_2014_840_MOESM3_ESM.pdf/9454426)

# Stabilized BP by Dialysate Temperature Adjustment

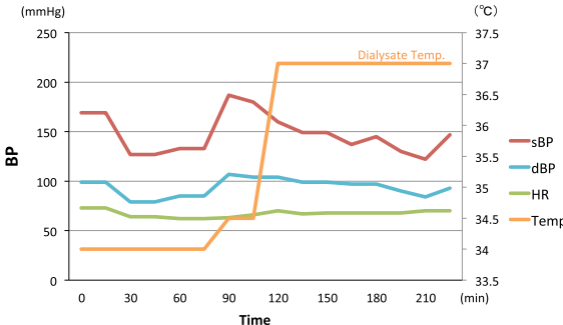

Supplement: MOESM3 [file 9454426]
